# Supplementary material for: A high-rate cathode material hybridized by in-site grown Ni–Fe layered double hydroxides and carbon black nanoparticles
Source: Royal Society of Chemistry journal article supplement (doi:10.1039/c6ta00842a), 2016-01-01
Supplement: c6ta00842a1.pdf [file c6ta00842a1.pdf]

## Supporting information

### **A high-rate cathode material hybridized by in-site grown Ni-Fe layered double hydroxide and carbon black nanoparticles**

**Shuzhen Chen,<sup>a</sup> Min Mao,<sup>a</sup> Xi Liu,<sup>a</sup> Shiyu Hong,<sup>a</sup> Zhouguang Lu,<sup>b</sup> Shangbin Sang,<sup>a</sup> Kaiyu Liu,<sup>a</sup> Hongtao Liu<sup>a\*</sup>**

<sup>a</sup>College of Chemistry and Chemical Engineering, Central South University, Changsha 410083, China

<sup>b</sup>Department of Materials Science and Engineering, South University of Science and Technology of China, Shenzhen 518055, China

\* Corresponding author. E-mail: liuht@csu.edu.cn; Tel: +86 731 8887 9616

## XRD

To probe the as-obtained Ni-Fe LDHs and the hybrid HT-LDH/CB material, we have carried out XRD patterns. As is shown in Figure S1, Ni-Fe LDHs exhibits the typical characteristics of LDH materials. The characteristic bands at  $2\theta = 9.9^\circ$ ,  $22.8^\circ$ ,  $34.5^\circ$  and  $60.3^\circ$ , corresponding to the (003), (006), (101+012) and (110+113) diffraction peaks, respectively, are in good agreement with those of standard patterns of  $\text{Ni}_6\text{Fe}_2(\text{SO}_4)(\text{OH})_{16}\cdot 4\text{H}_2\text{O}$  (JCPDS no.:42-0573). By the way, the atomic rate of Ni and Fe (3:1) can also be proved by XPS test. From these parameters, the basal spacing of Ni-Fe LDHs is estimated to 0.78 nm, which is in good agreement with that reported for Ni-Fe LDHs in the previous literature.<sup>1, 2</sup> HT-LDH/CB hybrid displays similar characteristic bands to Ni-Fe LDHs while the (003) diffraction peak is more sharp and skewing to the right. This indicates the HT-LDH/CB hybrid owns better crystalline forms. Additionally, no residual peaks have been observed, confirming the absence of contaminant phases.

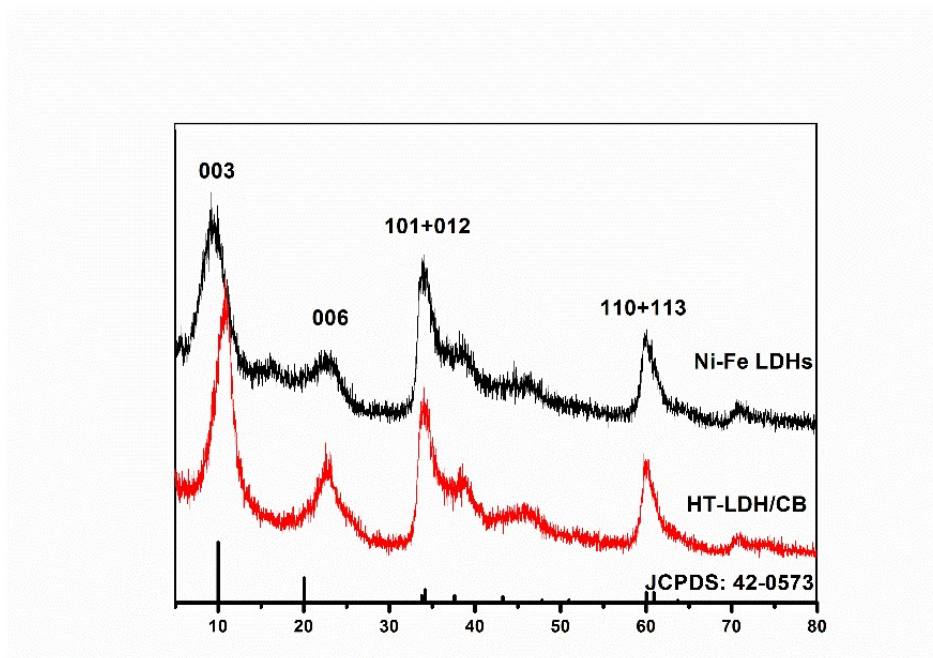

**Figure S1** XRD patterns of Ni-Fe LDHs and HT-LDH/CB

## XPS

XPS is a reliable method for investigating the oxidation state of atoms in the top few layers of material surfaces with partially filled valence bonds. Figure S2 shows the XPS survey spectra of Ni-Fe LDHs and HT-LDH/CB. Figure S3 indicates the core-level XPS spectra of S, O, C of Ni-Fe LDHs and HT-LDH/CB. The S 1s peaks at 168.2 eV is hexavalent sulfur elemental typically, which is consistent with those of standard patterns of  $\text{Ni}_6\text{Fe}_2(\text{SO}_4)(\text{OH})_{16}\cdot 4\text{H}_2\text{O}$ .<sup>3</sup>

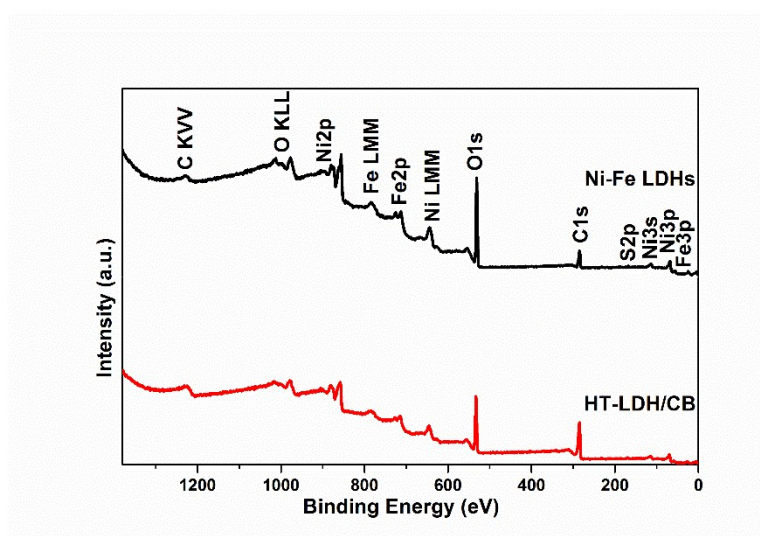

**Figure S2** Survey XPS spectra of Ni-Fe LDHs and HT-LDH/CB

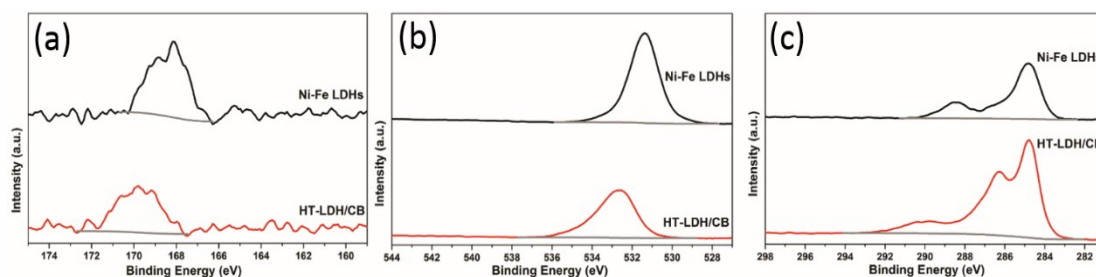

**Figure S3** Core-level XPS spectra of Ni-Fe LDHs and HT-LDH/CB (a, S 2p; b, O 1s; c, C 1s)

## FTIR

The FT-IR spectrum of Ni-Fe LDHs and the hybrid HT-LDH/CB material in the region between 400 and 4000  $\text{cm}^{-1}$  are shown in Figure S4. The infrared bands around 3443  $\text{cm}^{-1}$  can be ascribed to the OH-stretching vibration in the brucite-like layers and interlayer water, and the strong absorption at 1622  $\text{cm}^{-1}$  is attributed to the hydroxyl deformation mode of the interlayer water molecules. They support the ideas that the sample has OH groups and that water molecules are present in the interlayers. The mode located at about 1106  $\text{cm}^{-1}$  is assigned to S=O stretching vibration. The band observed at 665  $\text{cm}^{-1}$  attributed to Fe-O or Ni-O. These results are in good agreement with the XRD data.<sup>2,4</sup>

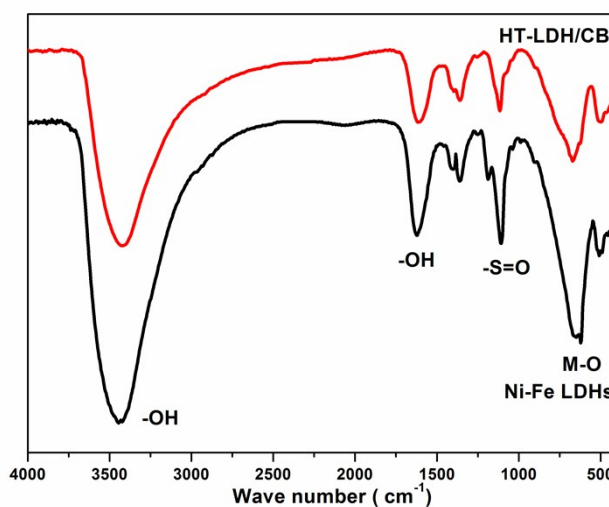

**Figure S4** FT-IR spectra of Ni-Fe LDHs and HT-LDH/CB

## CV

Shown in Figure S5 are the CV curves of Ni-Fe LDHs, HT-LDH/CB and PM-LDH/CB at scan rates 5~50  $\text{mV}\cdot\text{s}^{-1}$ . The peak current increases with the scan rate, and the peak area of the HT-LDH/CB electrode is apparently larger than that of the Ni-Fe LDHs or PM-LDH/CB electrode, implying a higher utilization of active material and larger electrode capacity of the HT-LDH/CB electrode.

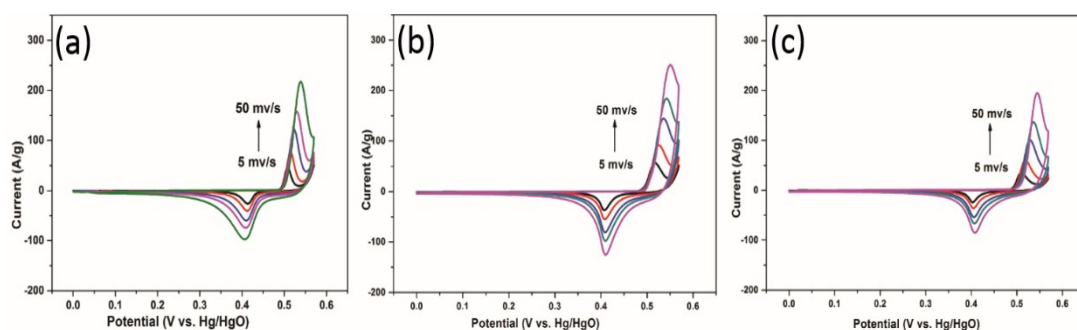

**Figure S5** CV curves of (a, Ni-Fe LDHs; b, HT-LDH/CB; c, PM-LDH/CB) at different scan rates of 5, 10, 20 and 50  $\text{mV}\cdot\text{s}^{-1}$  in 6.0 M KOH solution

**Table S1** XPS patterns of the Ni-Fe LDH product

| Name | Start<br>BE | Centre<br>BE | End<br>BE | Height<br>CPS | FWHM<br>eV | PP Height<br>CPS | PP At.<br>% | Title<br>Scan |
|------|-------------|--------------|-----------|---------------|------------|------------------|-------------|---------------|
| C1s  | 291.28      | 284.84       | 282.38    | 4569.24       | 1.46       | 4589.9           | 22.94       | C1s           |
| O1s  | 535.88      | 531.39       | 527.68    | 25389.11      | 1.69       | 25788.42         | 47.01       | O1s           |
| Ni3p | 77.93       | 68.15        | 64.98     | 1902.97       | 2.51       | 2083.3           | 20.24       | Ni-Fe         |
| Fe3p | 63.58       | 56.74        | 52.68     | 423.4         | 3.09       | 507.34           | 6.53        | Ni-Fe         |
| S2p  | 170.68      | 168.18       | 166.28    | 307.81        | 2.19       | 373.86           | 3.27        | S2p           |

**Table S2** XPS patterns of the HT-LDH/CB product

| Name | Start<br>BE | Centre<br>BE | End<br>BE | Height<br>CPS | FWHM<br>eV | PP Height<br>CPS | PP At.<br>% | Title<br>Scan |
|------|-------------|--------------|-----------|---------------|------------|------------------|-------------|---------------|
| C1s  | 294.08      | 284.9        | 282.08    | 7528.99       | 1.39       | 8087.86          | 64.34       | C1s           |
| O1s  | 537.68      | 532.69       | 528.78    | 13581.58      | 2.18       | 13606.22         | 20.79       | O1s           |
| Ni3p | 79.11       | 69.56        | 66.16     | 1112.42       | 2.93       | 1243.1           | 10.12       | Ni-Fe         |
| Fe3p | 62.91       | 58.06        | 53.23     | 236.09        | 3.27       | 294.42           | 3.18        | Ni-Fe         |
| S2p  | 172.68      | 169.65       | 167.48    | 197.63        | 2.42       | 215.16           | 1.58        | S2p           |

## Notes and references

1. X. Wang, S. Zhou, W. Y. Xing, B. Yu, X. M. Feng, L. Song and Y. Hu, *J. Mater. Chem. A*, 2013, **1**, 4383-4390.
2. T. Iwasaki, H. Yoshii, H. Nakamura and S. Watano, *Appl. Clay Sci.*, 2012, **58**, 120-124.
3. L.-J. Zhou, X. Huang, H. Chen, P. Jin, G.-D. Li and X. Zou, *Dalton Transactions*, 2015, **44**, 11592-11600.
4. S. Z. Zhao, H. H. Yi, X. L. Tang, D. J. Kang, H. Y. Wang, K. Li and K. J. Duan, *Appl. Clay Sci.*, 2012, **56**, 84-89.
